# Supplementary material for: LncRNA HOXC-AS1 Sponges miR-99a-3p and Upregulates MMP8, Ultimately Promoting Gastric Cancer
Source: MDPI journal article supplement (doi:10.3390/cancers14143534), 2022-07-20
Supplement: s1 [file s1]

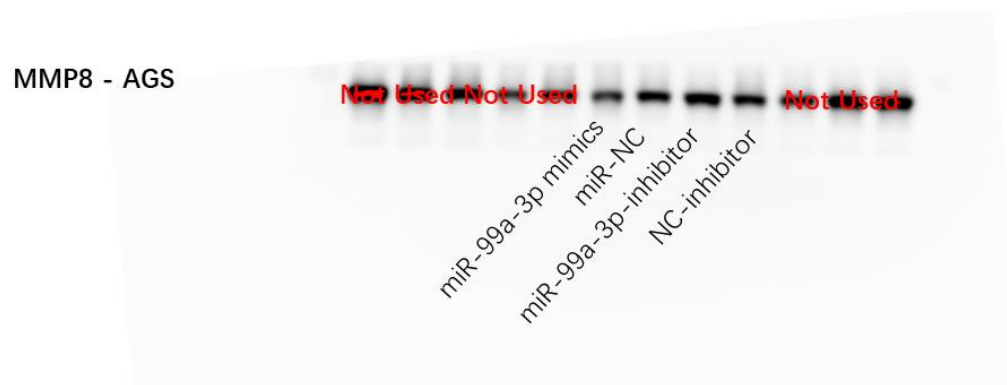

**Figure S1.** MMP8 expression under overexpression and downregulation of miR-99a-3p in AGS cell line.

## MMP8 – SGC7901

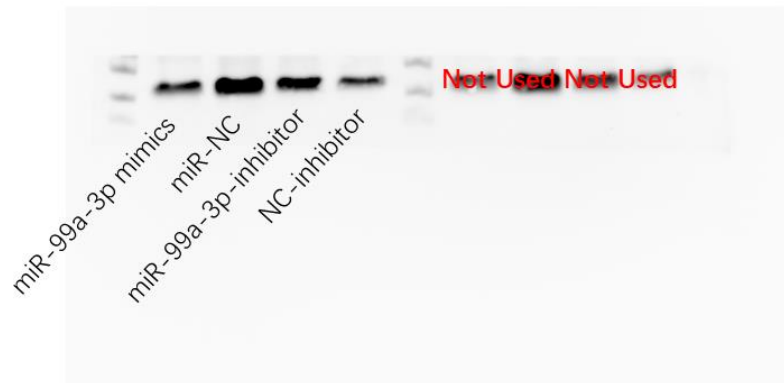

**Figure S2.** MMP8 expression under overexpression and downregulation of miR-99a-3p in SGC7901 cell line.

ACTIN

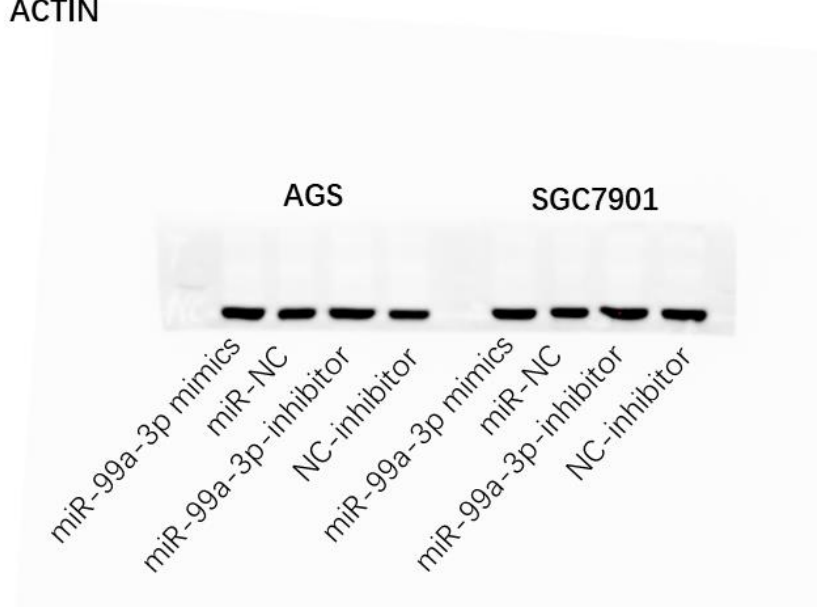

**Figure S3.** Actin expression under overexpression and downregulation of miR-99a-3p in AGS and SGC7901 cell lines.

MMP8 - AGS

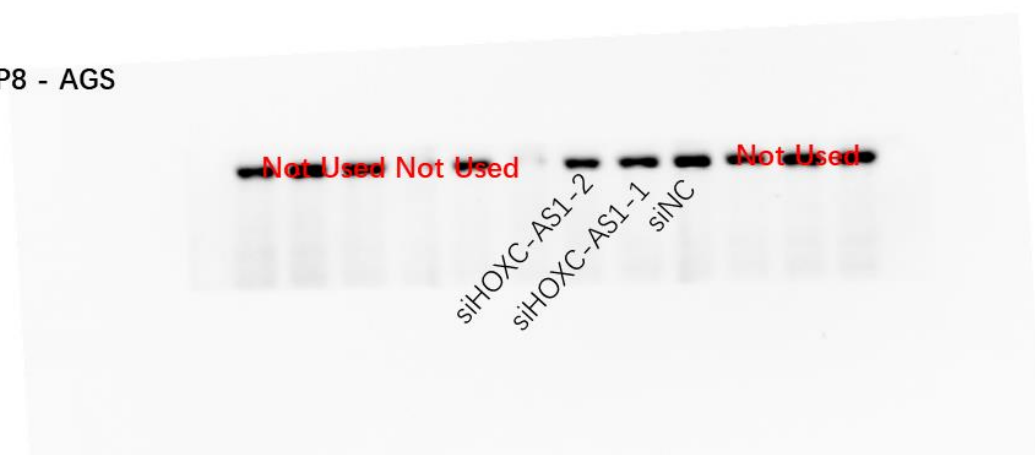

**Figure S4.** MMP8 expression following downregulation of HOXC-AS1 in AGS cell line.

# ACTIN - AGS

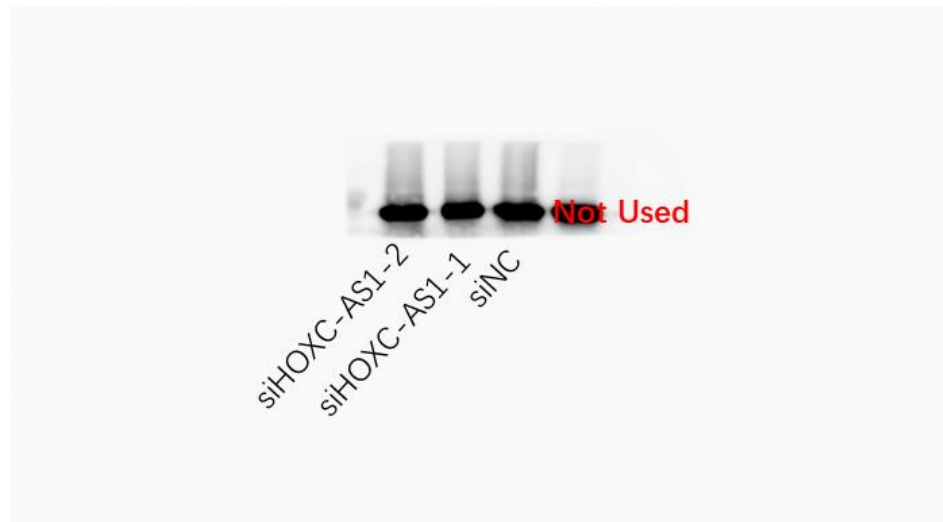

**Figure S5.** Actin expression following downregulation of HOXC-AS1 in AGS cell line.

MMP8 – SGC7901

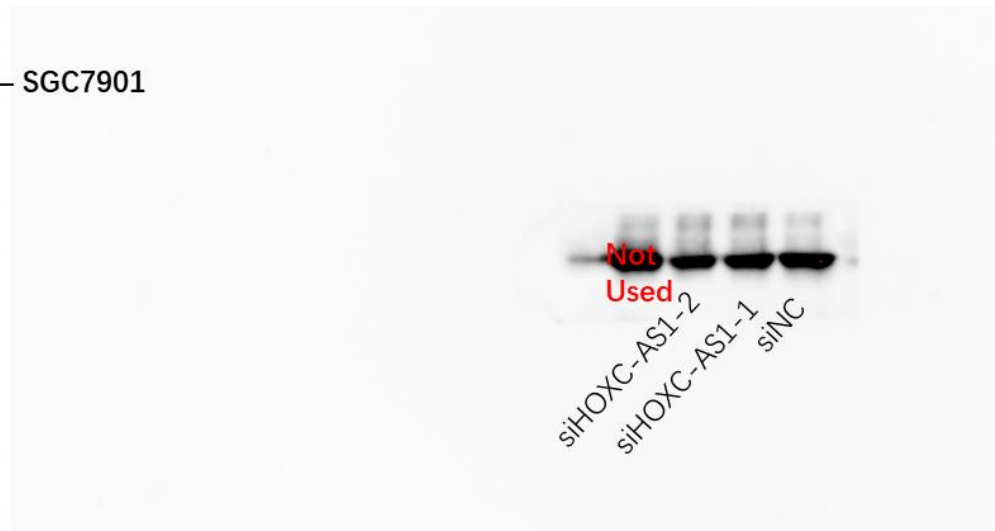

**Figure S6.** MMP8 expression following downregulation of HOXC-AS1 in SGC7901 cell line.

# ACTIN – SGC7901

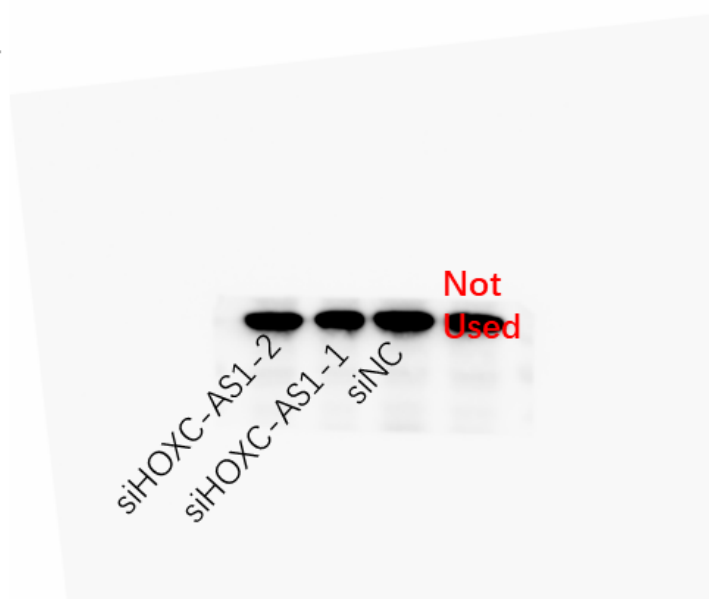

**Figure S7.** Actin expression following downregulation of HOXC-AS1 in SGC7901 cell line.
